# Supplementary material for: Characterization of the porcine nutrient and taste receptor gene repertoire in domestic and wild populations across the globe
Source: PubMed Central journal article supplement (PMC4302110; doi:10.1186/1471-2164-15-1057), 2014-12-03

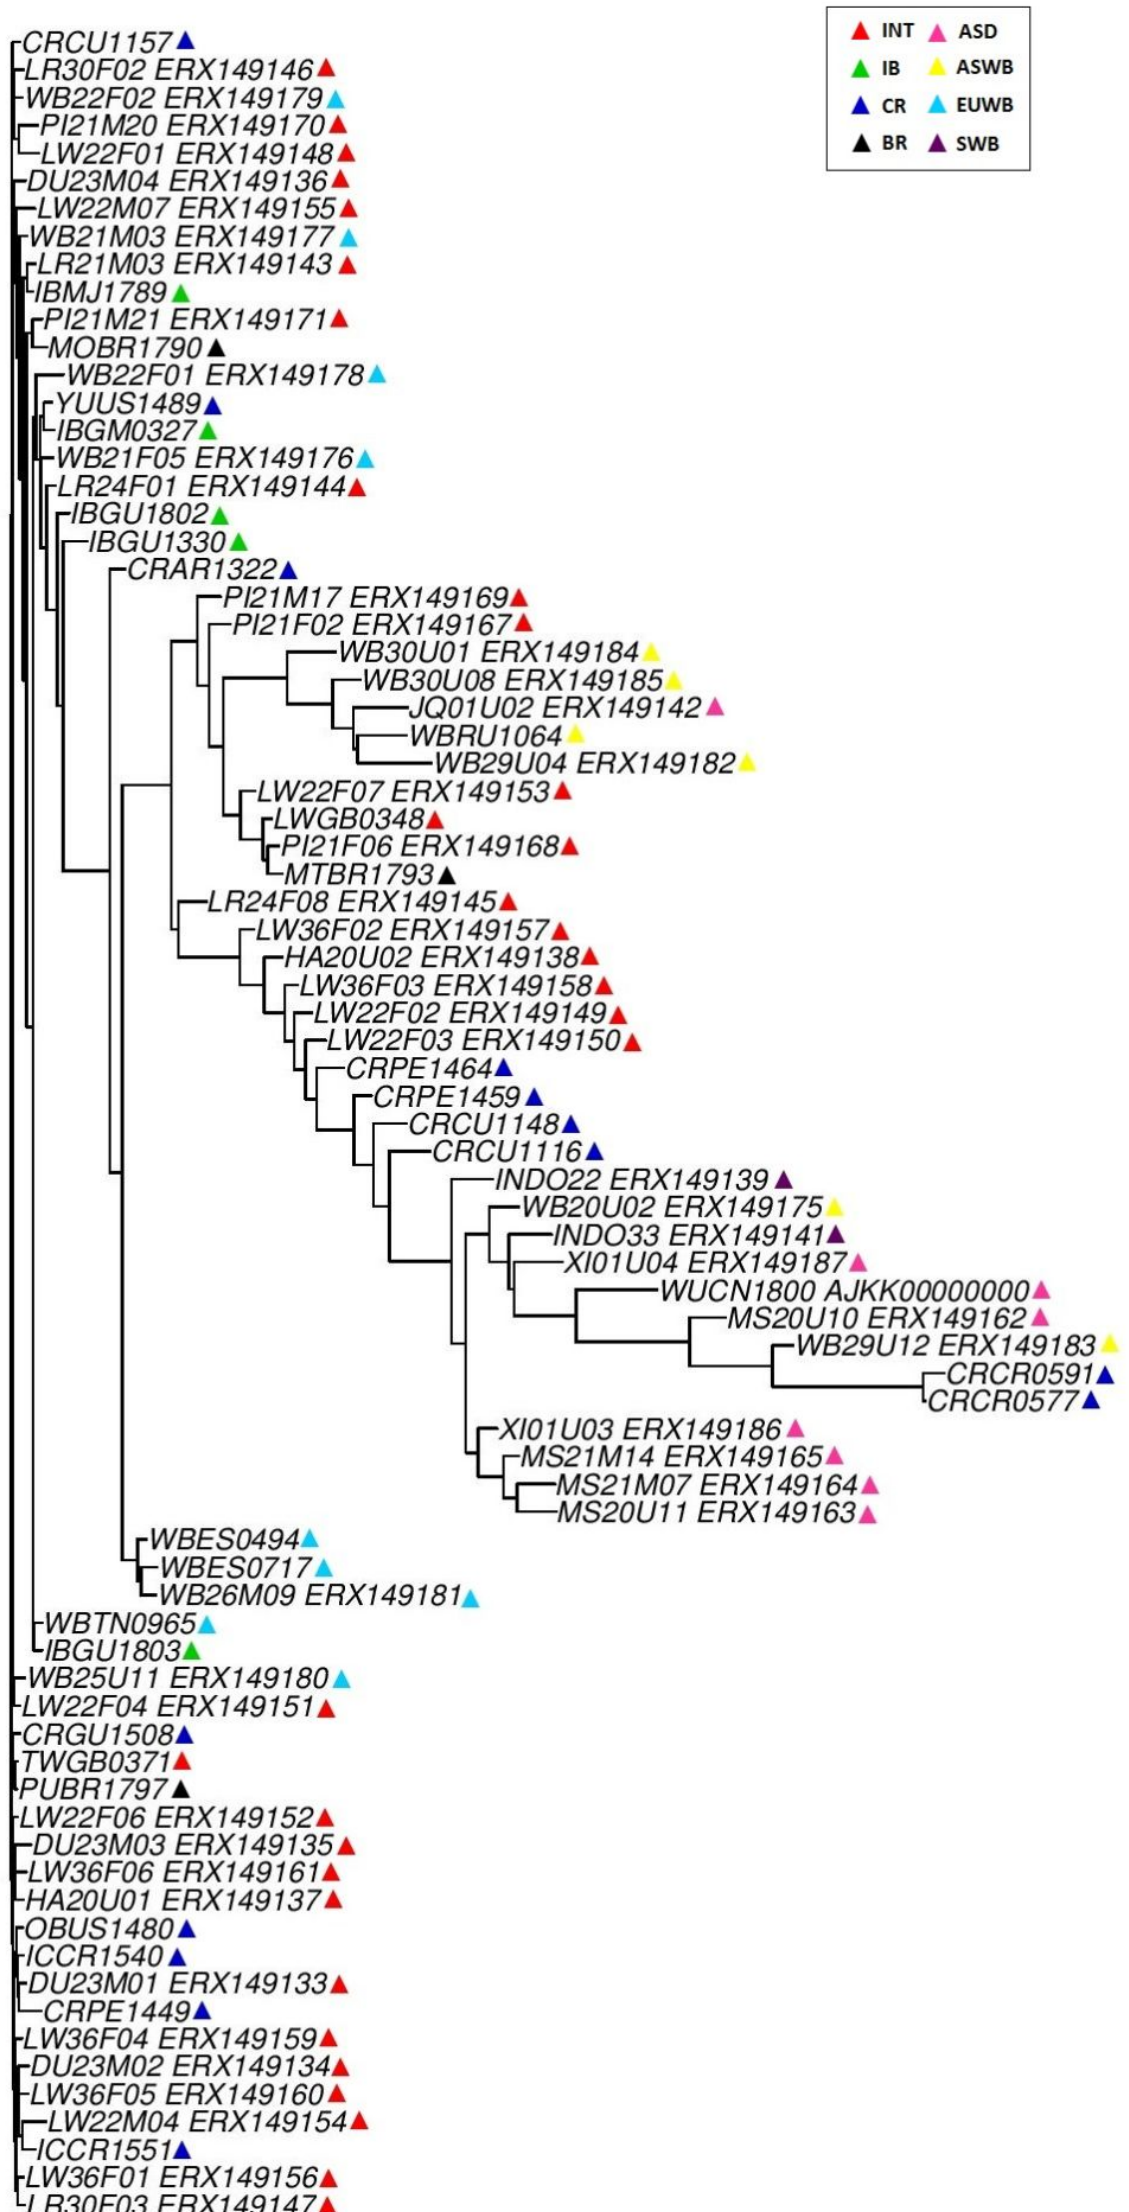

Supplement: 12864_2014_6798_MOESM5_ESM.pdf [file 12864_2014_6798_MOESM5_ESM.pdf]
